# 1 A brush fire feedback loop for the ramp-like rise in 2 hominin brain size that began 2.4 million years ago

3

4 WILLIAM H. CALVIN

5 Department of Psychiatry and Behavioral Sciences, University of Washington,  
6 725 9th Avenue, Box 2605, Seattle WA 98104-2086, WCalvin@UW.edu, and the  
7 UCSD/Salk Center for Academic Research and Training in Anthropogeny, La Jolla CA  
8 92037

9  
10

11 During the first million years of the Pleistocene climate changes, our ancestors'  
12 brain size doubled. Enlargement continued at the same rate, suggesting a self-  
13 sustaining process with a rate-limiting component. For large grazing animals  
14 and their predator *Homo erectus*, I analyzed the brush-fire cycle behind  
15 grasslands' brushy frontier, seeking a feedback loop. The burn scar's new grass  
16 is an empty niche for grass-specialized herbivores, which evolved from mixed  
17 feeders only in the early Pleistocene. The frontier subpopulation of grazers  
18 discovering the auxiliary grassland quickly multiplies. Following this boom, a  
19 bust occurs several decades later when the brush returns; it squeezes this  
20 offshoot population back into the core grasslands population. For both prey  
21 and predators, such a feedback loop can shift the core's gene frequencies  
22 toward those of the brush explorers.

23 Hunters of both browsers and grazers spend more time in the brush than  
24 those specializing in grazers; this versatility becomes a candidate for  
25 differential amplification. Any brush-relevant allele could benefit from  
26 amplifying feedback by such trait hitchhiking, so long as its phenotypes also  
27 concentrate near where empty niches can open up in the brush for grazers and  
28 their predators. Increased versatility likely correlates with larger brain size on  
29 the evolutionary time scale. Among the tasks likely to need the shade of brush  
30 are toolmaking and food preparation. The more versatile, larger-than-average  
31 brains need only spend more-than-average time in the catchment zone for this  
32 recursive evolutionary process to keep average brain size increasing even  
33 further, making advance room for some future functionality in the cerebral  
34 cortex.

35

1 As the ice ages began 2.5 million years, Africa dried and the great  
2 savannas developed (1). Bursts of speciation promptly occurred  
3 among the herbivores (2). In their hominin predators, brain size  
4 began to increase and inexplicably doubled over the next million  
5 years (Fig. 1). Furthermore, brain size (3,4) kept on increasing at  
6 the same rate as the initial doubling, even without any additional  
7 increase in stature.

8 The uninflected ramp-like rise, seen when non-ancestral data  
9 points are excluded, suggests that the rate of enlargement is  
10 neither sensitive to such ice age trends as the progressively colder  
11 glacial temperatures (Fig. 1), nor to the major transitions in  
12 toolmaking complexity, nor to the appearance of successor *Homo*  
13 species. The brain's enlargement rate of  $453 \text{ cm}^3 \text{ myr}^{-1}$  over 2.4  
14 myr may simply reflect the rate-limiting step among even faster  
15 processes contributing to enlargement (much as the slowest  
16 supplier of parts limits the speed of an assembly line).

17 Fig. 1. The bipedal woodland apes had brains little larger than  
18 those of the great apes (bonobo is illustrated). Brain size in  
19 ancestral *Homo* doubled by 1.4 mya. The same enlargement  
20 rate continued until pre-agricultural *Homo sapiens*. The  
21 dashed line is extrapolated back from the solid line, a least  
22 squares fit to ancestral (to us) crania (N=68) between 15 kya  
23 and 1.9 mya. This excludes data points from known side  
24 branches: Neandertals, *Homo erectus* younger than 0.8 myr,  
25 and Australopiths younger than 2.4 mya. Earlier Australopiths  
26 (N=18) have a separate line fit. Data sets from (3,25; scaled  
27 photographs from T.W. Deacon.

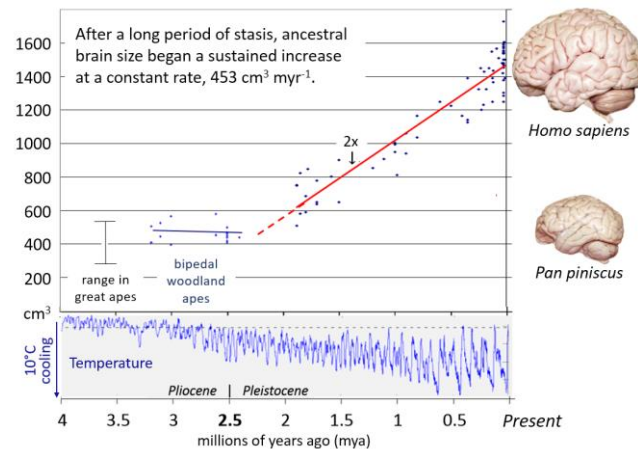

28

29 For large grazing animals, I earlier analyzed (5) the brush-fire  
30 cycle behind grasslands' brushy frontier, seeking feedback loops.  
31 The burn scar's new grass is an empty niche for grass-specialized  
32 herbivores, which evolved from mixed feeders only in the early  
33 Pleistocene about 2.4 mya. The frontier subpopulation of grazers  
34 discovering an auxiliary grassland should quickly multiply.

35 Following this boom, a bust occurs several decades later when  
36 the brush returns; it squeezes this offshoot population back into

1 the core grasslands population. For both prey and predators, such  
2 a feedback loop can shift the core's gene frequencies toward those  
3 of the brush explorers. Any brush-relevant allele could benefit  
4 from this amplifying feedback loop by trait hitchhiking (5), so long  
5 as its phenotypes concentrate near where empty niches can open  
6 up in the brush. Improved survival is unnecessary.

7 Such trait hitchhiking appears relevant to three of the central  
8 problems in evolution: (a) the doubling of our ancestors' brain size  
9 in the first million years of the Pleistocene; (b) promoting in  
10 *Homo* another of the rare instances of eusociality; and (c) bursts of  
11 evolutionary extravagance such as our higher intellectual  
12 functions. A feedback role in promoting antibiotic resistance is  
13 also postulated (5).

## 14 The grass road out of Africa

15 Early *Homo erectus* appeared on the East African scene by 1.9  
16 mya, with a shoulder already adapted for throwing projectiles (6).  
17 Hunting and scavenging the large grazing animals, they appear to  
18 have followed a grass road north out of equatorial Africa, making  
19 it to Dmanisi, at 42°N between the Black Sea and the Caspian, by  
20 1.8 mya. The habitat there was similar to the African savanna:  
21 grasses, arid conditions, and an abundance of large herbivores (7).

22 What took *Homo erectus* from the trade-wind tropics to a  
23 continental climate with harsh winters? One candidate for a  
24 process is that, when a herd of large grazing mammals has never  
25 encountered two-legged hunters before, they were easy prey. After  
26 being hunted a while, the herd becomes so wary that hunters move  
27 on to the next naïve herd. They cannot go back toward depleted  
28 and wary herds and so, like a burning fuse, they advance to the  
29 next hunter-naïve herd farther up the grass road whose northern  
30 terminus is the Arctic Ocean.

31 The border of the grass road may be a shoreline or a hyper-arid  
32 zone but the usual border is brush, providing occasional shade. It

1 usually has a ragged edge, with narrowing paths of grass that  
2 terminate in a brushy dead end.

### 3 Brush as a part-time hominin habitat

4 The mile-high savannas of East Africa and South Africa have a  
5 particularly high rate of lightning strikes. Many brush fires result  
6 and, in the dry season, a large area can burn. Soon, grass sprouts.  
7 If the burn scar has a path connecting to inhabited grassland,  
8 grazing animals from the brush frontier subpopulation will move  
9 in.

10 Predators would have followed the grazing animals into the  
11 auxiliary grassland, many skimmed off of the predator population  
12 exploiting the brushy dead ends. They too will experience a  
13 population boom, though more slowly as the temporary grassland  
14 would, in the case of hominins, endure little more than two  
15 generations. They too will be squeezed out and many could join  
16 the core population.

17 The hunter-gatherer bands, originally attracted into the grass  
18 road by the succession of grazing herds, would have regularly  
19 visited the brush frontier, seeking shade and the traditional foods  
20 obtained by gathering. With long sticks, they could club small  
21 animals in the brush, including such small browsers as dik-dik.  
22 Cooking or overnight campfires, once invented perhaps 1.8 mya  
23 (8), would have required daily gathering of firewood behind the  
24 brush borders of grasslands.

25 These are among the reasons why much of the grasslands  
26 hominin population might want to visit the brush in a touch-and-  
27 go manner. However, those whose innate habitat preferences  
28 cause them to hang out longer in the brush (greater dwell time)  
29 would benefit reproductively when lightning strikes.

30

## 1 Waterhole predation

2 The last waterholes remaining in the dry season were likely those  
3 near a brush border (the surviving brush indicating sufficient soil  
4 moisture in prior dry seasons). Despite  
5 lions hiding in the brush (Fig. 2), grazing  
6 herds of zebra and wildebeest will pay an  
7 obligatory visit to such a waterhole every  
8 other day; browsers need not visit as often  
9 because of the water content of leaves.

10 Fig. 2. A lioness hiding in the brush begins an attack at a waterhole in  
11 Etosha National Park, Namibia. Before human intervention, Etosha's  
12 savannas and woodlands would burn about once per decade, clearing  
13 brush. Being specialized for grass, zebra and wildebeest must visit  
14 waterholes much more frequently than species getting much of their  
15 water from consuming leaves. Credit: Des & Jen Bartlett, National  
16 Geographic Creative.

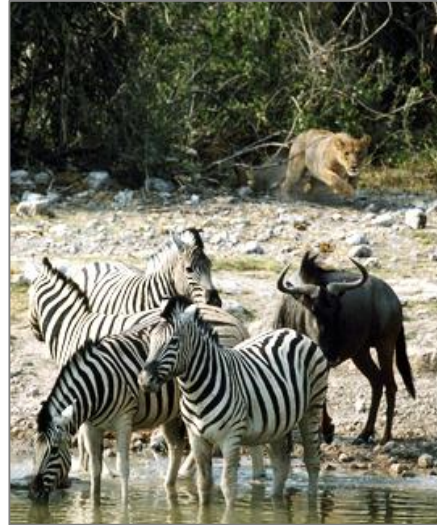

17 A lion kill is often followed by a contest with scavengers over  
18 possession of the carcass; spotted hyenas can take a carcass away  
19 from small groups of lions (9). Power scavenging need not carry  
20 away the entire carcass; *Homo erectus* could have used a sharp  
21 edge and blunt dissection to amputate a hind limb quickly, leaving  
22 behind the fat-filled belly to ensure that the temporarily displaced  
23 lions do not follow when a hind limb is carried away.

24 Vanishing into nearby brush should make this power  
25 scavenging technique somewhat safer; also, a sturdy tree trunk  
26 may be required later. Clubbing with a long bone, in the manner  
27 of a baseball bat, can create a spiral fracture, allowing access to  
28 bone marrow without tools or hyena-strength jaws.

29 Given such a milieu, the components of the *Homo erectus*  
30 feedback loop are:

- 31 • a central grasslands population of *Homo* that mixes, though some  
32 are inclined to hang out in the brush more than others;

- 1 • an allele concentration from this habitat preference, and the
- 2 tendency to skim off the brush population when the path to the new
- 3 niche opens up;
- 4 • a population boom for this biased *Homo* population, because their
- 5 surplus-to-requirements offspring can grow up to reproduce, and
- 6 because their food resource, the grazer population, doubles even
- 7 more quickly to maintain a surplus of high-quality food;
- 8 • leakage of this biased boom time population back into the central
- 9 core when brush returns, shifting core and brush frontier gene
- 10 frequencies; and repeat with the next brush fire.

11

12 With the predators getting their own population boom by  
13 hanging out in the catchment zone for the boom of a major food  
14 source, hitchhiking is enabled for hominid traits that tend to  
15 concentrate in the catchment for reasons other than predation on  
16 grazers—say, the shade-seeking  
17 utilized in my previous article  
18 (5) to address eusociality’s  
19 communal nursery aspect.

20 Fig. 3. The hominin population will secondarily  
21 experience a boom in the empty niche of the burn scar.  
22 Other genes with a concentration gradient between  
23 core and catchment zone, e.g., the more versatile  
24 hunter-scavengers and those clustering around  
25 cooperative nurseries in the brush’s shade, will later  
26 shift their core gene frequencies via the feedback loop.

27

## 28 A hitchhiking bootstrap for brain enlargement

29 The amplifying feedback loop for grazers could have affected the  
30 genus *Homo* via promoting increasing behavioral versatility, and  
31 thus eventually brain size, provided that the more versatile had  
32 longer dwell times in the brush to concentrate the trait’s allele  
33 there.

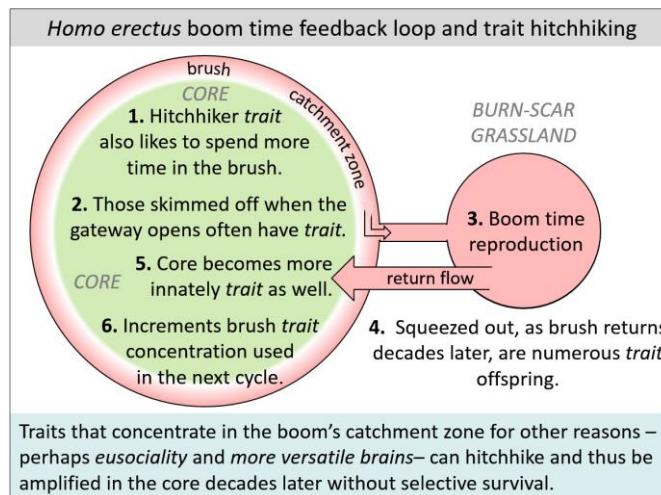

1 For example, those versatile enough to hunt both grazers and  
2 browsers would get more boom-time opportunities from the  
3 grazer boom, even though it is a boom only for grazers.

4 A long toolmaking session is best done in the shade provided by  
5 brush, as are advanced food preparation and cooperative  
6 nurseries. Those specializing in open-terrain confrontational  
7 scavenging (10), or running a herbivore to exhaustion (11), would  
8 often miss an opportunity to fill an empty niche opening up, back  
9 in the brush.

10 Building up behavioral versatility over the last 2.4 myr includes  
11 improving the hand-eye coordination for the “get set” ballistic  
12 movements (12, 13), such as accurate throwing from ever greater  
13 distances and the increasingly delicate hammering needed for the  
14 fine serrated cutting edges of Achulean-style tools. The new meat-  
15 rich diet exposed genes for both ballistic movements to improved  
16 survival.

17 Such elaborate (and often novel to the instance) muscle  
18 command sequences could, however, benefit from having a motor  
19 equivalent of working memory (14,15), a flexible workspace in the  
20 cerebral cortex for “get set” planning of ballistic movements, likely  
21 on the fringes of specialized movement areas. With time, a new  
22 innate movement specialization—say, hammering— could take root  
23 in the flexible workspace, though perhaps at the expense of losing  
24 some space for planning other ballistic movements, serving to  
25 decrease throwing accuracy.

26 However, there is a 15% spread in brain size in a given  
27 generation (16). Those individuals in a post-specialization  
28 generation, with a brain sufficiently larger than the current  
29 average, will have the original amount of flexible workspace  
30 despite the space commitment to the new specialization.

31 This “have your cake and eat it too” outcome might reasonably  
32 be called a preadaptation: mapping a second innovation is easier

1 in those individuals of the current generation with sufficiently  
2 larger-than-the-current-average brains.

3 Because brain size is as heritable as parental height (16),  
4 bootstrapping to a new normal via assortative mating can be done  
5 by hanging out in the catchment zone for the boom time feedback  
6 loop, bypassing the need to keep proving the worth of a slightly  
7 bigger brain with each increment.

## 8 The constant rate of brain enlargement

9 Darwin's sexual selection (17) is what Fisher (18) called a  
10 "runaway" process. Female mate choice can directly shift the gene  
11 frequencies in the next generation; it need not use an external  
12 feedback loop through an empty niche to force the shift indirectly  
13 with boom-time numbers.

14 Fast feedback processes could, however, bootstrap both  
15 behavioral versatility and brain size. Other brain size  
16 considerations may be rate limiting: familiar candidates include  
17 staying ahead of the birth canal bottleneck (19) and that the  
18 brain's share of the blood supply had to keep increasing at the  
19 expense of something else, such as digestion (20).

20 Were some constraining genes lacking alternative versions, thus  
21 stopping enlargement, then  $453 \text{ cm}^3 \text{ myr}^{-1}$  might be proportional  
22 to the rate at which cosmic rays or copying errors could create a  
23 new allele for amplification by the feedback loop—perhaps  
24 loosening a constraint on the faster underlying processes. A  
25 constant rate of mutation might then explain the linear rise in  
26 brain size.

27 As in chemistry's autocatalytic processes, this amplification  
28 loop has failure modes. Had grass-only herbivores been hunted to  
29 extinction, there would no longer have been boom times and  
30 amplification would have stopped—even though browsers and  
31 mixed-feeders continued to provide a meat diet for *Homo*. Once



1 agriculture developed, the meat supply no longer constrained  
2 human population numbers.

### 3 Discussion

4 This identifies one fast autocatalytic process that could contribute  
5 to our ancestral brain's ramp-like enlargement. This feedback  
6 loop for the predators of grazers also suggests why ramp-like  
7 enlargement began 2.4 mya and not earlier (Fig. 1).

8 At 4 mya in East Africa, most large herbivores were  
9 unspecialized mixed feeders; by 2.4 mya, most had specialized for  
10 either grass or leaves (21). Although lightning strikes, brush fires,  
11 allele concentration in the catchment, and feedback loops could all  
12 operate before 2.4 mya, burn-scar booms for both grazers and  
13 their hominin predators could not operate, minimizing shifts in  
14 core allele ratios. Once grazer booms were enabled 2.4 mya,  
15 predator booms could begin to operate; only then did a free ride  
16 route become possible for some brush-related *Homo* traits,  
17 speeding the separation from Australopithecines.

18 A ramp mechanism facilitating trait hitchhiking for versatility  
19 does open up a new way of thinking about an evolutionary  
20 extravagance, such as the large gap in intellect between great apes  
21 and preagricultural humans that so puzzled Alfred Russel Wallace  
22 (22). Structured cognitive functions are extravagant by great ape  
23 standards and it is difficult to make selective survival arguments,  
24 especially for their early phases.

25 Hitchhiking now seems promising to explore as an alternative  
26 evolutionary path for syntax and the other higher intellectual  
27 functions: structured music, contingent planning, chains of logic,  
28 games with rules about possible moves, analogies that extend to  
29 parables, and creativity's eureka moments when incoherent  
30 mental assemblies become coherent fits, good to go.

1 If a projectile misses, dinner tends to run away. I have  
2 suggested that projectile predation regularly rewarded  
3 improvements in the structured planning needed for novel  
4 ballistic movements, incidentally improving the neural circuitry  
5 also utilized by the higher intellectual functions (13,14,23).

6 For exploring their evolution, examining settings may be more  
7 productive than the usual focus on increments in usefulness. Any  
8 trait with alleles that concentrate in the catchment zone may be on  
9 a fast track. For example, pantomime or short-sentence  
10 protolanguage can be used to gossip about “Who did what to  
11 whom, where, when, and with what means?” (Given the instincts  
12 guiding female mate choice, reputation is often of interest.) But a  
13 speedier verbal version needs some help from structuring  
14 conventions (grammar and syntax) if a listener is to quickly  
15 understand the longer or more complex expressions.

16 For the shade of the catchment zone, hands are often busy and  
17 so the verbal structured version of gossip may get many hours of  
18 practice each day (24) and would be routinely overheard by young  
19 children. While there is little in this language example that is  
20 exposed to selective survival, the shady setting provides preferred  
21 access to selective fecundity’s (5) boom time loop.

22 As sexual selection did for the extravagant peacock tail,  
23 feedback loops can surprise us with progressions that keep going  
24 automatically—as in that afore-mentioned preadaptation for the  
25 next new thing, in all the children who are above average.

26

27 I thank my CARTA colleagues for two decades of expert discussions about  
28 human evolution, funded by the Mathers Foundation.

29

30 **References**

- 1 1. deMenocal PB. African climate change and faunal evolution during  
2 the Pliocene-Pleistocene. *Earth and Planetary Science Letters*. 2004;  
3 220: 3-24. Link:  
4 [www.ldeo.columbia.edu/~peter/site/Papers\\_files/deMenocal.2004.pdf](http://www.ldeo.columbia.edu/~peter/site/Papers_files/deMenocal.2004.pdf).
- 5 2. Vrba ES. The fossil record of African antelopes (Mammalia, Bovidae)  
6 in relation to human evolution and paleoclimate. In Vrba ES, Denton  
7 GH, Partridge TC, Burckle LS, editors. *Paleoclimate and Evolution with*  
8 *emphasis on Human Origins*. New Haven CT: Yale University Press;  
9 1995, pp. 385-424.
- 10 3. Holloway RS, Yuan MS, Broadfield DC. *The Human Fossil Record:*  
11 *Brain Endocasts - The Paleoneurological Evidence, Volume Three*. New  
12 York: Wiley; 2004, Appendix 1, p. 295. Fig. 1 (upper) is edited down  
13 from their database.
- 14 4. Shultz S, Nelson E, Dunbar RIM (2012). Hominin cognitive  
15 evolution: identifying patterns and processes in the fossil and  
16 archaeological record. *Philosophical Transactions of the Royal Society B:*  
17 *Biological Sciences*. 2012; 367(1599): 2130-2140. DOI:  
18 10.1098/rstb.2012.0115.
- 19 5. Calvin WH. Eusociality and other improbable evolutionary outcomes  
20 can be accelerated by trait hitchhiking in boom-bust feedback loops.  
21 Preprint. Available: bioRxiv 2016;  
22 doi: <http://dx.doi.org/10.1101/053819>
- 23 6. Roach NT, Venkadesan M, Rainbow MJ, Lieberman DE. Elastic  
24 energy storage in the shoulder and the evolution of high-speed throwing  
25 in *Homo*. *Nature* 2013; 498: 483-486. doi: 10.1038/nature12267.
- 26 7. Messenger E, Lordkipanidze D, Kvavadze E, Ferring CR, Voinchet P.  
27 Palaeoenvironmental reconstruction of Dmanisi site (Georgia) based on  
28 palaeobotanical data. *Quaternary International* 2010; 223: 20-27. doi:  
29 10.1016/j.quaint.2009.12.016.
- 30 8. Gowlett JAJ, Wrangham RW. Earliest fire in Africa: towards the  
31 convergence of archaeological evidence and the cooking hypothesis.  
32 *Azania* 2013; 48: 5-30. doi: 10.1080/0067270X.2012.756754.
- 33 9. Trinkel M, Kastberger G. Competitive interactions between spotted  
34 hyenas and lions in the Etosha National Park, Namibia. *African Journal*  
35 *of Ecology* 2005; 43: 220-224. doi: 10.1111/j.1365-2028.2005.00574.x.

- 1 10. Bunn HT. Hunting, power scavenging, and butchering by Hadza  
2 foragers and by Plio-Pleistocene Homo. In: Stanford CB, Bunn HT,  
3 editors, *Meat-eating and Human Evolution*, pp. 199-218. New York:  
4 Oxford University Press; 2001.
- 5 11. Lieberman DE, Bramble DM, Raichlen RA, Shea JJ. Brains, brawn,  
6 and the evolution of human endurance running capabilities. Grine FE,  
7 Fleagle JG, Leakey RE, editors. *The First Humans – Origin and Early*  
8 *Evolution of the Genus Homo*. Amsterdam: Springer Netherlands; pp.  
9 77-92; 2009. Link: [link.springer.com/chapter/10.1007%2F978-1-4020-](http://link.springer.com/chapter/10.1007%2F978-1-4020-9980-9_8)  
10 [9980-9\\_8](http://link.springer.com/chapter/10.1007%2F978-1-4020-9980-9_8).
- 11 12. Calvin WH. A stone's throw and its launch window: timing  
12 precision and its implications for language and hominid brains. *Journal*  
13 *of Theoretical Biology* 1983; 104: 121-135. Link:  
14 [cogprints.org/21/1/1983JTheoretBiol.htm](http://cogprints.org/21/1/1983JTheoretBiol.htm)
- 15 13. Calvin WH. *A Brain for All Seasons: Human Evolution and Abrupt*  
16 *Climate Change*. London and Chicago: University of Chicago Press;  
17 2002.
- 18 14. Calvin WH. *A Brief History of the Mind*. New York: Oxford  
19 University Press; 2004.
- 20 15. Gallivan JP, Johnsrude IS, Flanagan JR. Planning ahead: object-  
21 directed sequential actions decoded from human frontoparietal and  
22 occipitotemporal networks. *Cerebral Cortex*; 2015. doi:  
23 [10.1093/cercor/bhu302](https://doi.org/10.1093/cercor/bhu302).
- 24 16. Witelson SF, Beresh H, Kigar DL. Intelligence and brain size in 100  
25 postmortem brains: sex, lateralization and age factors. *Brain* 2006; 129:  
26 386–398. doi: [10.1093/brain/awh696](https://doi.org/10.1093/brain/awh696).
- 27 17. Darwin CR. *The Descent of Man, and Selection in Relation to Sex*.  
28 London: John Murray; 1871.
- 29 18. Fisher RA. *The Genetical Theory of Natural Selection*. Oxford:  
30 Clarendon; 1930. Link: [jhered.oxfordjournals.org/content/21/8/349](http://jhered.oxfordjournals.org/content/21/8/349).
- 31 19. Huseynov A, Zollikofer CP, Coudyzer W, Gascho D, Kellenberger C,  
32 Hinzpeter R, Ponce de León MS. Developmental evidence for obstetric  
33 adaptation of the human female pelvis. *Proc Natl Acad Sci U S A*. 2016;  
34 113(19): 5227-32. doi: [10.1073/pnas.1517085113](https://doi.org/10.1073/pnas.1517085113).

- 1 20. Aiello LC, Wheeler P. The expensive-tissue hypothesis: the brain and  
2 the digestive system in human and primate evolution. *Current*  
3 *Anthropology* 1995; 36: 199-221. Link: [www.jstor.org/stable/2744104](http://www.jstor.org/stable/2744104).
- 4 21. Cerling TE, Andanje SA, Blumenthal SA, Brown FH, Chritz KL,  
5 Harris JM, et al. Dietary changes of large herbivores in the Turkana  
6 Basin, Kenya from 4 to 1 Ma. *Proc Natl Acad Sci U S A.* 2015; 112: 11467-  
7 11472. doi: 10.1073/pnas.1513075112
- 8 22. Bickerton D. *More than Nature Needs: Language, Mind, and*  
9 *Evolution.* Cambridge MA: Harvard University Press; 2014.
- 10 23. Calvin WH, Bickerton D. *Lingua ex Machina.* Cambridge MA: MIT  
11 Press, p.83; 2000.
- 12 24. Dunbar RIM. Gossip in evolutionary perspective. *Review of general*  
13 *psychology* 2004; 8: 100-110. doi: 10.1037/1089-2680.8.2.100.
- 14 25. Lisiecki LE, Raymo ME. A Pliocene-Pleistocene stack of 57 globally  
15 distributed benthic  $\delta^{18}\text{O}$  records. *Paleoceanography* 2005; 20: PA1003.  
16 doi: 10.1029/2004PA001071. Fig. 1 (lower) is replotted from their  
17 database.
